# Supplementary material for: COVID-19 Vaccine Hesitancy and Its Associated Factors in Japan
Source: MDPI journal article supplement (doi:10.3390/vaccines9060662), 2021-06-17
Supplement: s1 [file s1]

# **Title: COVID-19 vaccine hesitancy and associated factors in Japan**

**List:**

**Supplementary Methods S1**-Statistical analysis

**Table S1.** Distribution of COVID-19 case numbers by prefecture.

**Table S2.** Participants' baseline characteristics for analyses (before propensity score weighting).

**Table S3.** Proportion of COVID-19 vaccine hesitancy, stratified by age and sex.

**Table S4.** Reasons for getting vaccinated against the COVID-19 and not getting vaccinated, stratified by age.

**Table S5.** Logistic regression models for odds ratio of COVID-19 vaccine hesitancy, stratified by age.

**Supplementary S1.** Management of data quality.

## Supplementary Methods S1- Statistical analysis

Selectivity of Internet-based samples were corrected for by the use of a population-based sample that was representative of the Japanese population from the Comprehensive Survey of Living Conditions of People on Health and Welfare (CSLCPHW). This survey is conducted every 3 years in the first week of June, investigating living conditions and collecting basic data required by the Japanese Ministry of Health, Labour and Welfare (MHLW) for planning and management. It covers households and household members nationwide, and requires participant responses to a detailed self-reported questionnaire. Of 940,000 sampling districts included in population censuses in 2010, random sampling of 5410 districts was performed in 2016 for CSLCPHW data collection. In each district, all household members were asked to respond to a questionnaire on living conditions and health. Within the 5410 sampling districts, there 289,470 households, of which 224,208 responded to the questionnaire (response rate, 77.5%). The MHLW permitted use of these data in the present study.

The data from both the present Internet survey and the CSLCPHW were combined and input into a logistic regression model, along with each of the abovementioned covariates to estimate the probability of “being a respondent in an Internet survey” (i.e., propensity score [PS]). We stratified by sex and age group (sex  $\times$  age groups = 14 strata), and calculated the PS separately for each stratum [1, 2]. Data from the 2016 CSLCPHW were used because the 2019 CSLCPHW was not yet available at the time of analysis.

A multivariable logistic regression model was used to calculate the PS in each stratum (age and sex groups). Variables available in both of the surveys were used in the models. For respondents aged 20-79 years, we adjusted for area (residence), marital status, education, homeownership (household), self-rated health, and smoking status. For respondents aged 15-19 years, we adjusted for area, education, homeownership (household), and self-rated health, but omitted marital and smoking status because this age group was too young to yield a different distribution of marital status and the Ministry stopped asking teenagers about their smoking status from 2013.

## References

1. Tabuchi, T.; Shinozaki, T.; Kunugita, N.; Nakamura, M.; Tsuji, I. Study Profile: The Japan "Society and New Tobacco" Internet Survey (JASTIS): A Longitudinal Internet Cohort Study of Heat-Not-Burn Tobacco Products, Electronic Cigarettes, and Conventional Tobacco Products in Japan. *Journal of epidemiology* 2019, 29, 444-450, doi:10.2188/jea.JE20180116.
2. Tabuchi T, Shinozaki T, Kunugita N et al. Study Profile: The Japan "Society and New Tobacco" Internet Survey (JASTIS): A Longitudinal Internet Cohort Study of Heat-Not-Burn Tobacco Products, Electronic Cigarettes, and Conventional Tobacco Products in Japan. *J Epidemiol* 2019; 29: 444-450.

**Table S1.** Distribution of COVID-19 case numbers by prefecture.

| Prefecture-level cumulative number of COVID-19 cases per 1,000,000 population until Feb 7, 2021 |                                                                                                                                                                                                                                                                                                                              |                                                                                  |
|-------------------------------------------------------------------------------------------------|------------------------------------------------------------------------------------------------------------------------------------------------------------------------------------------------------------------------------------------------------------------------------------------------------------------------------|----------------------------------------------------------------------------------|
| Mean (min-max) case                                                                             |                                                                                                                                                                                                                                                                                                                              |                                                                                  |
|                                                                                                 | Lower                                                                                                                                                                                                                                                                                                                        | Higher                                                                           |
| Number of COVID-19 cases by prefecture                                                          | 1472 (278-3135)                                                                                                                                                                                                                                                                                                              | 4751 (3270-7520)                                                                 |
| Prefectures                                                                                     | Akita, Tottori, Shimane, Iwate, Niigata, Yamagata, Tokushima, Aomori, Fukui, Kagawa, Ehime, Toyama, Yamaguchi, Fukushima, Kagoshima, Oita, Yamaguchi, Nagano, Nagasaki, Wakayama, Saga, Kochi, Okayama, Shizuoka, Mie, Ishikawa, Miyazaki, Shiga, Hiroshima, Miyazaki, Ibaraki, Kumamoto, Tochigi, Gunma, Gifu, Nara, Hyogo, | Aichi, Fukuoka, Kyoto, Hokkaido, Saitama, Chiba, Kanagawa, Osaka, Okinawa, Tokyo |
| Values throughout Japan until Feb 7, 2021 equal 3203 cases per 1,000,000 population.            |                                                                                                                                                                                                                                                                                                                              |                                                                                  |

**Table S2.** Participants' baseline characteristics included in analyses (before propensity score weighting).

|                                                                | Total<br>(N = 23,142) |      |
|----------------------------------------------------------------|-----------------------|------|
|                                                                | N                     | %    |
| <i>Sex, Female</i>                                             | 11,376                | 49.2 |
| <i>Age group (years)</i>                                       |                       |      |
| Younger (15-39)                                                | 6686                  | 28.9 |
| Middle-aged (40-64)                                            | 10,554                | 45.6 |
| Older (65-79)                                                  | 5903                  | 25.5 |
| <i>Income (million JPY/year)</i>                               |                       |      |
| less than 1                                                    | 841                   | 3.6  |
| 1 to less than 6                                               | 10,699                | 46.2 |
| 6 to less than 120                                             | 5433                  | 23.5 |
| 120 or more                                                    | 952                   | 4.1  |
| No response/unknown                                            | 5217                  | 22.5 |
| <i>Marital status</i>                                          |                       |      |
| Never married                                                  | 5697                  | 24.6 |
| Married                                                        | 15,262                | 65.9 |
| Widowed/divorced                                               | 2183                  | 9.4  |
| Living alone, yes                                              | 3076                  | 13.3 |
| <i>Occupation</i>                                              |                       |      |
| Health care professional                                       | 877                   | 3.8  |
| Essential worker in the food industry                          | 3381                  | 14.6 |
| Other occupation                                               | 9878                  | 42.7 |
| Unemployed                                                     | 9006                  | 38.9 |
| <i>Educational level</i>                                       |                       |      |
| Junior high school graduate                                    | 4114                  | 17.8 |
| High school graduate                                           | 9739                  | 42.1 |
| Two-year college graduate                                      | 3366                  | 14.5 |
| Bachelor's degree                                              | 4315                  | 18.6 |
| Master's or doctoral degree                                    | 1608                  | 7.0  |
| <i>Use of combustible cigarettes or HTPs</i>                   |                       |      |
| Neither                                                        | 19,024                | 82.2 |
| Only HTPs                                                      | 2286                  | 9.9  |
| Only combustible cigarettes                                    | 915                   | 4.0  |
| Dual use                                                       | 917                   | 4.0  |
| <i>Alcohol use</i>                                             |                       |      |
| Never                                                          | 7269                  | 31.4 |
| Ever                                                           | 7717                  | 33.3 |
| Current                                                        | 8156                  | 35.2 |
| <i>Comorbidity (present)</i>                                   |                       |      |
| Hypertension                                                   | 4359                  | 18.8 |
| Diabetes mellitus                                              | 1628                  | 7.0  |
| Asthma or COPD                                                 | 1031                  | 4.5  |
| Cardiovascular disease                                         | 310                   | 1.3  |
| Cerebrovascular disease                                        | 260                   | 1.1  |
| Cancer                                                         | 442                   | 1.9  |
| Chronic pain                                                   | 2330                  | 10.1 |
| Psychiatric disorders                                          | 1463                  | 6.3  |
| Personal history of COVID-19 infection                         | 400                   | 1.7  |
| Fear of COVID-19-induced death                                 | 7884                  | 34.1 |
| Perceived likelihood of getting infected with COVID-19 himself | 3197                  | 13.8 |
| Distrust toward the government                                 | 16,962                | 73.3 |
| Distrust toward government policy on COVID-19                  | 15,724                | 67.9 |
| The thought of embarrassment of getting infected with COVID-19 | 5463                  | 23.6 |

|                                                                    |      |      |
|--------------------------------------------------------------------|------|------|
| Severe psychological distress, yes                                 | 2741 | 11.8 |
| Living in a prefecture with a high proportion of<br>COVID-19 cases | 7730 | 33.4 |

Abbreviations: JPY, Japanese Yen; HTP, heated tobacco product; COPD, chronic obstructive pulmonary disease; COVID-19, coronavirus disease 2019.

**Table S3.** Proportion of COVID-19 vaccine hesitancy, stratified by age and sex.

|                           | COVID-19 Vaccine Intention          |                                                    | Hesitant<br>"I don't want to be vaccinated" |
|---------------------------|-------------------------------------|----------------------------------------------------|---------------------------------------------|
|                           | Intend<br>"I want to be vaccinated" | "I want to be vaccinated after seeing how it goes" |                                             |
| All                       | 35.9                                | 52.8                                               | 11.3                                        |
| Male respondents          | 41.7                                | 48.1                                               | 10.2                                        |
| Younger (15-39 years)     | 31.0                                | 54.8                                               | 14.2                                        |
| Middle-aged (40-64 years) | 38.1                                | 51.3                                               | 10.6                                        |
| Older (65-79 years)       | 36.5                                | 18.3                                               | 4.8                                         |
| Female respondents        | 29.9                                | 57.6                                               | 12.5                                        |
| Younger (15-39 years)     | 18.8                                | 65.6                                               | 15.6                                        |
| Middle-aged (40-64 years) | 27.1                                | 59.8                                               | 13.2                                        |
| Older (65-79 years)       | 47.6                                | 44.7                                               | 7.7                                         |

Analyses were weighted to adjust for differences between Internet survey respondents and nationally representative samples. Abbreviation: COVID-19, coronavirus disease 2019.

**Table S4.** Reasons for getting vaccinated against COVID-19, or not getting vaccinated, stratified by age.

| <b>(A) Among younger respondents aged 15-39 years.</b>     |                                   |                    |
|------------------------------------------------------------|-----------------------------------|--------------------|
|                                                            | <b>COVID-19 Vaccine Intention</b> |                    |
|                                                            | <b>Intend, %</b>                  | <b>Hesitant, %</b> |
| <i>Reasons for getting vaccinated, %</i>                   |                                   |                    |
| It was recommended by a family member or friend            | 4.4                               |                    |
| It was recommended by SNS or the media                     | 3.7                               |                    |
| I'm worried about getting infected with COVID-19           | 24.3                              |                    |
| I think I have a high risk of becoming seriously ill       | 5.0                               |                    |
| I am a medical worker                                      | 5.4                               |                    |
| I don't want to infect my family or other people around me | 25.0                              |                    |
| I think it is necessary for society to be vaccinated       | 21.7                              |                    |
| I can get it for free                                      | 15.3                              |                    |
| <i>Reasons for not getting vaccinated, %</i>               |                                   |                    |
| I don't have time to go get vaccinated                     |                                   | 12.4               |
| I'm worried about adverse reactions                        |                                   | 68.1               |
| I don't think it is very effective                         |                                   | 19.1               |
| I don't think I will get infected.                         |                                   | 9.6                |
| I think I have a low risk of getting seriously ill         |                                   | 10.4               |
| I was previously infected with COVID-19                    |                                   | 0.3                |
| I have received the COVID-19 vaccine                       |                                   | 0.8                |
| It was recommended by a family member or friend            |                                   | 2.2                |
| It was recommend by SNS or the media                       |                                   | 4.7                |
| <b>(B) Among middle-aged respondents aged 40-64 years.</b> |                                   |                    |
|                                                            | <b>COVID-19 Vaccine Intention</b> |                    |
|                                                            | <b>Intend, %</b>                  | <b>Hesitant, %</b> |
| <i>Reasons for getting vaccinated, %</i>                   |                                   |                    |
| It was recommended by a family member or friend            | 2.0                               |                    |
| It was recommended by SNS or the media                     | 1.3                               |                    |
| I'm worried about getting infected with the COVID-19       | 30.0                              |                    |
| I think I have a high risk of becoming seriously ill       | 12.6                              |                    |
| I am a medical worker                                      | 3.7                               |                    |
| I don't want to infect my family or other people around me | 32.7                              |                    |
| I think it is necessary for society to be vaccinated       | 29.5                              |                    |
| I can get it for free                                      | 18.0                              |                    |
| <i>Reasons for not getting vaccinated, %</i>               |                                   |                    |
| I don't have time to go get vaccinated                     |                                   | 7.7                |
| I'm worried about adverse reactions                        |                                   | 75.8               |
| I don't think it is very effective                         |                                   | 19.9               |
| I don't think I will get infected.                         |                                   | 6.8                |
| I think I have a low risk of getting seriously ill         |                                   | 6.4                |
| I was previously infected with COVID-19                    |                                   | 0.4                |
| I have already received the COVID-19 vaccine               |                                   | 0.2                |
| It was recommended by a family member or friend            |                                   | 0.5                |
| It was recommended by SNS or the media                     |                                   | 1.9                |
| <b>(C) Among older respondents aged 65-79 years.</b>       |                                   |                    |
|                                                            | <b>COVID-19 Vaccine Intention</b> |                    |
|                                                            | <b>Intend, %</b>                  | <b>Hesitant, %</b> |
| <i>Reasons for getting vaccinated, %</i>                   |                                   |                    |
| It was recommended by a family member or friend            | 2.4                               | -                  |
| It was recommended by SNS or the media                     | 1.1                               | -                  |
| I'm worried about getting infected with the COVID-19       | 47.6                              | -                  |
| I think I have a high risk of becoming seriously ill       | 37.2                              | -                  |
| I am a medical worker                                      | 2.0                               | -                  |

|                                                            |      |      |
|------------------------------------------------------------|------|------|
| I don't want to infect my family or other people around me | 43.1 | -    |
| I think it is necessary for society to be vaccinated       | 45.7 | -    |
| I can get it for free                                      | 22.5 | -    |
| <i>Reasons for not getting vaccinated, %</i>               |      |      |
| I don't have time to go get vaccinated                     | -    | 2.5  |
| I'm worried about adverse reactions                        | -    | 83.3 |
| I don't think it is very effective                         | -    | 18.6 |
| I don't think I will get infected                          | -    | 5.9  |
| I think I have a low risk of getting seriously ill         | -    | 3.6  |
| I was previously infected with COVID-19                    | -    | 1.1  |
| I have already received the COVID-19 vaccine               | -    | 0.0  |
| It was recommended by a family member or friend            | -    | 1.4  |
| It was recommended by SNS or the media                     | -    | 0.3  |

Analyses were weighted to adjust for differences between Internet survey respondents in the present study and nationally representative samples. Abbreviations: COVID-19, coronavirus disease 2019; SNS, social network services.



**Table S5.** Logistic regression models for odds ratio of COVID-19 vaccine hesitancy, stratified by age.

| <b>(A) Among younger respondents aged 15-39 years.</b>          |            |               |                |
|-----------------------------------------------------------------|------------|---------------|----------------|
|                                                                 | <b>aOR</b> | <b>95% CI</b> | <b>p-value</b> |
| <i>Sex, female</i>                                              | 1.04       | (0.89-1.21)   | 0.61           |
| <i>Income (million JPY/year)</i>                                |            |               |                |
| less than 1                                                     | 1.39       | (1.03-1.87)   | 0.03           |
| 1 to less than 6                                                | ref        | -             | -              |
| 6 to less than 120                                              | 0.82       | (0.68-1.00)   | 0.04           |
| 120 or more                                                     | 0.65       | (0.41-1.01)   | 0.06           |
| No response/unknown                                             | 1.11       | (0.93-1.33)   | 0.27           |
| <i>Marital status</i>                                           |            |               |                |
| Never married                                                   | ref        | -             | -              |
| Married                                                         | 0.89       | (0.75-1.05)   | 0.16           |
| Widowed/divorced                                                | 1.39       | (0.94-2.06)   | 0.10           |
| Living alone, yes                                               | 1.46       | (1.18-1.81)   | <0.01          |
| <i>Occupation</i>                                               |            |               |                |
| Health care professional                                        | 0.96       | (0.70-1.31)   | 0.79           |
| Essential worker in the food industry                           | 1.02       | (0.83-1.24)   | 0.88           |
| Other occupation                                                | ref        | -             | -              |
| Unemployed                                                      | 0.94       | (0.79-1.11)   | 0.46           |
| <i>Educational level</i>                                        |            |               |                |
| Junior high school graduate                                     | 1.16       | (0.93-1.44)   | 0.20           |
| High school graduate                                            | 0.95       | (0.78-1.16)   | 0.61           |
| Two-year college graduate                                       | 1.34       | (1.07-1.69)   | 0.01           |
| Bachelor's degree                                               | ref        | -             | -              |
| Master's or doctoral degree                                     | 1.01       | (0.61-1.67)   | 0.96           |
| <i>Use of combustible cigarettes or HTPs</i>                    |            |               |                |
| Neither                                                         | ref        | -             | -              |
| Only HTPs                                                       | 0.62       | (0.44-0.87)   | 0.01           |
| Only combustible cigarettes                                     | 1.83       | (1.36-2.46)   | <0.0001        |
| Dual use                                                        | 0.59       | (0.39-0.90)   | 0.01           |
| <i>Alcohol use</i>                                              |            |               |                |
| Never                                                           | ref        | -             | -              |
| Ever                                                            | 0.56       | (0.48-0.66)   | <0.0001        |
| Current                                                         | 0.62       | (0.50-0.75)   | <0.0001        |
| <i>Comorbidity (present)</i>                                    |            |               |                |
| Hypertension                                                    | 0.53       | (0.31-0.92)   | 0.02           |
| Diabetes mellitus                                               | 0.46       | (0.24-0.88)   | 0.02           |
| Asthma or COPD                                                  | 1.75       | (1.23-2.51)   | <0.01          |
| Cardiovascular disease                                          | 1.37       | (0.58-3.21)   | 0.47           |
| Cerebrovascular disease                                         | 1.17       | (0.51-2.69)   | 0.71           |
| Cancer                                                          | 1.24       | (0.58-2.65)   | 0.57           |
| Chronic pain                                                    | 0.63       | (0.45-0.89)   | 0.01           |
| Psychiatric disorders                                           | 0.87       | (0.66-1.16)   | 0.34           |
| Personal history of COVID-19 infection                          | 1.37       | (0.95-1.97)   | 0.09           |
| Fear of COVID-19-induced death                                  | 0.60       | (0.50-0.71)   | <0.0001        |
| Perceived likelihood of getting infected with COVID-19 itself   | 0.94       | (0.76-1.16)   | 0.56           |
| Distrust toward the government                                  | 1.48       | (1.19-1.84)   | <0.01          |
| Distrust toward government policy on COVID-19                   | 1.15       | (0.95-1.40)   | 0.14           |
| The thought of embarrassment of getting infected with COVID-19  | 0.97       | (0.82-1.14)   | 0.70           |
| Severe psychological distress, yes                              | 1.30       | (1.09-1.56)   | 0.00           |
| Living in a prefecture with a high proportion of COVID-19 cases | 0.94       | (0.81-1.10)   | 0.44           |
| <b>(B) Among middle-aged respondents aged 40-64 years.</b>      |            |               |                |

|                                                                   | aOR  | 95% CI      | p-value |
|-------------------------------------------------------------------|------|-------------|---------|
| <i>Sex, female</i>                                                | 1.11 | (0.96-1.28) | 0.15    |
| <b><i>Income (million JPY/year)</i></b>                           |      |             |         |
| less than 1                                                       | 1.38 | (1.03-1.84) | 0.03    |
| 1 to less than 6                                                  | ref  | -           | -       |
| 6 to less than 120                                                | 0.81 | (0.69-0.96) | 0.01    |
| 120 or more                                                       | 1.02 | (0.77-1.36) | 0.88    |
| No response/unknown                                               | 1.19 | (1.02-1.39) | 0.03    |
| <b><i>Marital status</i></b>                                      |      |             |         |
| Never married                                                     | ref  | -           | -       |
| Married                                                           | 0.61 | (0.51-0.72) | <.0001  |
| Widowed/divorced                                                  | 0.79 | (0.63-0.99) | 0.04    |
| Living alone, yes                                                 | 1.25 | (1.03-1.53) | 0.03    |
| <b><i>Occupation</i></b>                                          |      |             |         |
| Health care professional                                          | 0.61 | (0.42-0.89) | 0.01    |
| Essential worker in the food industry                             | 0.81 | (0.68-0.97) | 0.02    |
| Other occupation                                                  | ref  | -           | -       |
| Unemployed                                                        | 1.04 | (0.89-1.21) | 0.66    |
| <b><i>Educational level</i></b>                                   |      |             |         |
| Junior high school graduate                                       | 1.02 | (0.82-1.27) | 0.86    |
| High school graduate                                              | 1.14 | (0.96-1.37) | 0.14    |
| Two-year college graduate                                         | 1.20 | (0.97-1.48) | 0.09    |
| Bachelor's degree                                                 | ref  | -           | -       |
| Master's or doctoral degree                                       | 0.92 | (0.55-1.56) | 0.76    |
| <b><i>Use of combustible cigarettes or HTPs</i></b>               |      |             |         |
| Neither                                                           | ref  | -           | -       |
| Only HTPs                                                         | 0.95 | (0.78-1.15) | 0.57    |
| Only combustible cigarettes                                       | 0.69 | (0.50-0.97) | 0.03    |
| Dual use                                                          | 0.77 | (0.56-1.06) | 0.10    |
| <b><i>Alcohol use</i></b>                                         |      |             |         |
| Never                                                             | ref  | -           | -       |
| Ever                                                              | 0.72 | (0.62-0.84) | <.0001  |
| Current                                                           | 0.70 | (0.60-0.81) | <.0001  |
| <b><i>Comorbidity (present)</i></b>                               |      |             |         |
| Hypertension                                                      | 0.99 | (0.84-1.16) | 0.90    |
| Diabetes mellitus                                                 | 0.53 | (0.39-0.73) | <.0001  |
| Asthma or COPD                                                    | 0.95 | (0.67-1.34) | 0.76    |
| Cardiovascular disease                                            | 0.82 | (0.34-2.00) | 0.67    |
| Cerebrovascular disease                                           | 1.34 | (0.74-2.43) | 0.34    |
| Cancer                                                            | 1.44 | (0.90-2.30) | 0.13    |
| Chronic pain                                                      | 1.35 | (1.11-1.63) | <0.01   |
| Psychiatric disorder                                              | 0.54 | (0.41-0.72) | <.0001  |
| Personal history of COVID-19 infection                            | 1.38 | (0.78-2.41) | 0.27    |
| Fear of COVID-19-induced death                                    | 0.55 | (0.47-0.64) | <.0001  |
| Perceived likelihood of getting infected with COVID-19 themselves | 1.15 | (0.94-1.41) | 0.17    |
| Distrust toward the government                                    | 1.06 | (0.86-1.30) | 0.59    |
| Distrust toward government policy on COVID-19                     | 1.31 | (1.08-1.58) | 0.01    |
| The thought of embarrassment of getting infected with COVID-19    | 0.87 | (0.75-1.02) | 0.08    |
| Severe psychological distress, yes                                | 1.58 | (1.32-1.90) | <0.0001 |
| Living in a prefecture with a high proportion of COVID-19 cases   | 0.98 | (0.86-1.12) | 0.81    |
| <b>(C) Among older respondents aged 65-79 years.</b>              |      |             |         |
|                                                                   | aOR  | 95% CI      | p-value |
| <i>Sex, female</i>                                                | 2.24 | (1.68-3.00) | <0.0001 |
| <b><i>Income (million JPY/year)</i></b>                           |      |             |         |

|                                                                   |      |              |         |
|-------------------------------------------------------------------|------|--------------|---------|
| less than 1                                                       | 6.40 | (4.06-10.09) | <0.0001 |
| 1 to less than 6                                                  | Ref  | -            | -       |
| 6 to less than 120                                                | 0.55 | (0.34-0.90)  | 0.02    |
| 120 or more                                                       | 0.49 | (0.12-2.10)  | 0.34    |
| No response/unknown                                               | 0.37 | (0.26-0.54)  | <0.0001 |
| <b><i>Marital status</i></b>                                      |      |              |         |
| Never married                                                     | ref  | -            | -       |
| Married                                                           | 1.43 | (0.82-2.49)  | 0.21    |
| Widowed/divorced                                                  | 0.43 | (0.25-0.73)  | <0.01   |
| Living alone, yes                                                 | 2.00 | (1.24-3.22)  | <0.01   |
| <b><i>Occupation</i></b>                                          |      |              |         |
| Health care professional                                          | 0.16 | (0.01-2.48)  | 0.19    |
| Essential worker in the food industry                             | 0.48 | (0.25-0.94)  | 0.03    |
| Other occupation                                                  | ref  | -            | -       |
| Unemployed                                                        | 0.50 | (0.39-0.66)  | <0.0001 |
| <b><i>Educational level</i></b>                                   |      |              |         |
| Junior high school graduate                                       | 2.11 | (1.36-3.27)  | <0.01   |
| High school graduate                                              | 1.56 | (1.06-2.31)  | 0.03    |
| Two-year college graduate                                         | 1.51 | (0.87-2.62)  | 0.15    |
| Bachelor's degree                                                 | ref  | -            | -       |
| Master's or doctoral degree                                       | 1.11 | (0.70-1.77)  | 0.66    |
| <b><i>Use of combustible cigarettes or HTPs</i></b>               |      |              |         |
| Neither                                                           | ref  | -            | -       |
| Only HTPs                                                         | 1.51 | (1.04-2.19)  | 0.03    |
| Only combustible cigarettes                                       | 3.96 | (1.88-8.34)  | <0.01   |
| Dual use                                                          | 0.33 | (0.07-1.56)  | 0.16    |
| <b><i>Alcohol use</i></b>                                         |      |              |         |
| Never                                                             | ref  | -            | -       |
| Ever                                                              | 0.77 | (0.57-1.03)  | 0.07    |
| Current                                                           | 0.59 | (0.43-0.80)  | <0.01   |
| <b><i>Comorbidity (present)</i></b>                               |      |              |         |
| Hypertension                                                      | 0.81 | (0.61-1.07)  | 0.14    |
| Diabetes mellitus                                                 | 0.66 | (0.43-0.99)  | 0.04    |
| Asthma or COPD                                                    | 0.56 | (0.28-1.08)  | 0.08    |
| Cardiovascular disease                                            | 4.66 | (2.56-8.49)  | <0.0001 |
| Cerebrovascular disease                                           | 0.94 | (0.29-3.09)  | 0.92    |
| Cancer                                                            | 0.24 | (0.09-0.65)  | 0.01    |
| Chronic pain                                                      | 0.66 | (0.43-1.00)  | 0.05    |
| Psychiatric disorder                                              | 0.36 | (0.14-0.93)  | 0.03    |
| Personal history of COVID-19 infection                            | 5.96 | (1.48-23.94) | 0.01    |
| Fear of COVID-19-induced death                                    | 0.42 | (0.31-0.55)  | <0.0001 |
| Perceived likelihood of getting infected with COVID-19 themselves | 0.71 | (0.46-1.10)  | 0.13    |
| Distrust toward the government                                    | 1.61 | (1.02-2.52)  | 0.04    |
| Distrust toward government policy on COVID-19                     | 1.24 | (0.82-1.87)  | 0.32    |
| The thought of embarrassment of getting infected with COVID-19    | 2.40 | (1.84-3.12)  | <0.0001 |
| Severe psychological distress, yes                                | 2.78 | (1.46-5.29)  | <0.01   |
| Living in a prefecture with a high proportion of COVID-19 cases   | 1.18 | (0.92-1.52)  | 0.19    |

Analyses were weighted to adjust for differences between Internet survey respondents in the present study and nationally representative samples. Abbreviations: JPY, Japanese Yen; HTP, heated tobacco product; COPD, chronic obstructive pulmonary disease; COVID-19, coronavirus disease 2019; aOR, adjusted odds ratios; CI, confidence interval.

*Supplementary S1. Management of data quality*

We designed exclusion criteria to confirm data quality. The criteria were as follows:

**(A) Attention check**

We excluded respondents who answered incorrectly to the following question:  
Please choose the second from the bottom of the following options.

- A
- B
- C
- D
- E

\*The correct answer is D.

**(B1) straight-lining**

We excluded respondents who answered "almost every day" or "occasionally" (as opposed to "habitually in the past," "several times in the past," or "never") to all nine questionnaires regarding substance use:

(1) alcohol, (2) sleeping pills/anti-anxiety drugs, (3) prescribed narcotics for cancer pain, (4) prescribed narcotics for non-cancer pain, (5) non-prescribed narcotics, (6) inhalation of organic solvents such as paint thinner or toluene, (7) illegal herbs/magic mushrooms, (8) cannabis (marijuana), and (9) methamphetamine/cocaine/heroin.

**(B2) straight-lining**

We excluded respondents who answered "currently have this condition and receiving treatment" or "currently have this condition but not receiving treatment" (as opposed to "never in the past" or "not now, but existed in the past") to all 16 questions regarding the following comorbidities:

(1) hypertension, (2) diabetes, (3) asthma, (4) bronchitis/pneumonia, (5) atopic dermatitis, (6) periodontal disease, (7) caries, (8) otitis media, (9) angina pectoris, (10) myocardial infarction, (11) stroke, (12) chronic obstructive pulmonary disease, (13) cancer/malignant tumor, (14) chronic pain, (15) depression, and (16) mental disorder other than depression."
